# Supplementary material for: GBA mutation promotes early mitochondrial dysfunction in 3D neurosphere models
Source: publisher site journal article supplement (doi:10.18632/aging.102460), 2019-11-21
Supplement: Supplementary file [file aging-v11i22-102460-supplementary-material-SD2.pdf]

## SUPPLEMENTARY TABLES

Supplementary Table 1. Epidemiological data of the studied cohorts at the time of biopsy.

| GROUP               | N | GENDER |        | AGE   |      |       |
|---------------------|---|--------|--------|-------|------|-------|
|                     |   | MALE   | FEMALE | RANGE | MEAN | SEM   |
| wt/wt               | 2 | 1      | 1      | 56-73 | 64.5 | ±1.73 |
| wt/ $\Delta$        | 2 | 1      | 1      | 45-75 | 60   | ±2.3  |
| ( $\Delta/\Delta$ ) | 2 | 1      | 1      | 58-76 | 67   | ±1.78 |

No significant differences were found in age or gender between groups. wt/wt: controls, wt/*N370S* heterozygous subjects for *GBA* mutation and *N370S/N370S*: homozygous patients with *GBA* mutation. N: Number of cases enrolled. SEM: Standard error of the mean.

**Supplementary Table 2. Raw data of all the parameters measured.**

| Parameter (units)           |                                   | Raw data                 |          |                |          |        |             |          |        |         |          |              |
|-----------------------------|-----------------------------------|--------------------------|----------|----------------|----------|--------|-------------|----------|--------|---------|----------|--------------|
|                             |                                   | wt/wt (n=2)              |          | wt/N370S (n=2) |          |        | N370S/N370S |          | (n=2)  | ANOVA   |          |              |
|                             |                                   | MEAN                     | SEM (±)  | MEAN           | SEM (±)  | %      | MEAN        | SEM (±)  | %      |         |          |              |
| cell model characterization | neuronal markers (total n=6)      | blII-tubulin             | O DOD    | 51,55          | 13,43    | 139,84 | 7,11        | 171,27   | 76,58  | 2,32    | 48,55    | <b>0,013</b> |
|                             |                                   | (AU)                     | 2 DOD    | 95,32          | 71,73    | 315,15 | 71,54       | 230,62   | 174,05 | 83,21   | 82,60    | 0,262        |
|                             |                                   |                          | 4 DOD    | 65,88          | 59,25    | 200,98 | 21,98       | 205,07   | 150,79 | 93,86   | 128,89   | 0,440        |
|                             |                                   |                          | 6 DOD    | 75,73          | 66,91    | 236,28 | 55,15       | 212,00   | 145,21 | 128,56  | 91,74    | 0,524        |
|                             |                                   |                          | O DOD    | 373,98         | 229,95   | 122,12 | 4,40        | - 67,35  | 210,60 | 56,24   | - 43,69  | 0,502        |
|                             |                                   |                          | 2 D OD   | 245,73         | 58,84    | 63,04  | 35,14       | - 74,35  | 79,17  | 21,29   | - 67,78  | 0,190        |
|                             |                                   |                          | 4 DOD    | 49,42          | 9,56     | 0,63   | 0,35        | - 98,73  | 0,79   | 0,21    | - 98,40  | 0,716        |
|                             |                                   |                          | 6 DOD    | 67,18          | 15,41    | 96,66  | 60,73       | 43,89    | 83,10  | 25,19   | 23,70    | 0,872        |
|                             |                                   |                          | O DOD    | 0,14           | 0,07     | 0,03   | 0,03        | - 76,36  | 0,11   | 0,03    | - 22,00  | 0,380        |
|                             |                                   |                          | 2 D OD   | 1,00           | 0,42     | 0,97   | 0,19        | - 2,99   | 1,06   | 0,52    | 5,21     | 0,380        |
|                             |                                   |                          | 4 DOD    | 4,37           | 0,35     | 1,81   | 0,38        | - 58,60  | 1,10   | 0,52    | - 74,70  | 0,989        |
|                             |                                   |                          | 6 DOD    | 8,57           | 2,74     | 2,84   | 0,37        | - 66,84  | 2,00   | 1,04    | - 76,61  | 0,128        |
|                             |                                   | Gcase                    | O DOD    | 384,00         | 4,00     | 167,00 | 22,00       | - 56,51  | 0,50   | 1,50    | - 99,87  | <b>0,001</b> |
|                             |                                   | pH 5.4/NaT               | 2 DOD    | 502,50         | 25,50    | 149,50 | 42,50       | - 70,25  | 14,50  | 1,50    | - 97,11  | <b>0,003</b> |
|                             |                                   | (nmols/minmgpr           | 4 DOD    | 355,00         | 83,00    | 239,00 | 65,00       | - 32,68  | - 6,50 | 0,50    | - 101,83 | 0,053        |
|                             |                                   | ot)                      | 6 DOD    | 651,50         | 65,50    | 438,00 | 140,00      | - 32,77  | 10,50  | 26,50   | - 98,39  | <b>0,033</b> |
|                             |                                   | Gcase                    | O DOD    | 46,50          | 21,50    | 11,00  | 5,00        | - 76,34  | 8,50   | 0,50    | - 81,72  | 0,207        |
|                             |                                   | pH 4.5                   | 2 DOD    | 111,50         | 41,50    | 87,00  | 27,00       | - 21,97  | 54,50  | 6,50    | - 51,12  | 0,469        |
|                             |                                   | (nmols/minmgpr           | 4 DOD    | 145,00         | 52,00    | 86,50  | 9,50        | - 40,34  | 6,50   | 1,50    | - 95,52  | 0,469        |
|                             |                                   | ot)                      | 6 DOD    | 195,50         | 1,50     | 120,50 | 54,50       | - 38,36  | 56,00  | 46,00   | - 71,36  | 0,201        |
|                             |                                   | HEX                      | O DOD    | 66,50          | 23,50    | 71,50  | 15,50       | 7,52     | 56,50  | 3,50    | - 15,04  | 0,816        |
|                             |                                   |                          | 2 DOD    | 150,50         | 12,50    | 121,50 | 77,50       | - 19,27  | 109,00 | 17,00   | - 27,57  | 0,821        |
|                             |                                   | ot)                      | 4 DOD    | 133,50         | 29,50    | 150,00 | 19,00       | 12,36    | 122,00 | 28,00   | - 8,61   | 0,764        |
|                             |                                   |                          | 6 DOD    | 234,00         | 31,00    | 177,00 | 2,75        | - 24,36  | 209,50 | 99,50   | - 10,47  | 0,810        |
|                             | b-gal                             | O DOD                    | 292,00   | 73,00          | 340,50   | 20,50  | 16,61       | 192,50   | 19,50  | - 34,08 | 0,207    |              |
|                             |                                   | 2 D OD                   | 842,00   | 277,00         | 494,00   | 230,00 | - 41,33     | 775,00   | 232,00 | - 7,96  | 0,622    |              |
|                             | ot)                               | 4 DOD                    | 602,00   | 90,00          | 544,00   | 272,50 | - 9,63      | 528,00   | 133,00 | - 12,29 | 0,956    |              |
|                             |                                   | 6 DOD                    | 967,50   | 237,50         | 692,00   | 188,00 | - 28,48     | 587,50   | 240,50 | - 39,28 | 0,536    |              |
| mitochondria                | Mitochondrial content (Total n=9) | VDAC-1/b-actin (AU)      | UT       | 258,64         | 29,63    | 73,96  | 18,69       | - 71,41  | 338,34 | 88,81   | 30,82    | 0,088        |
|                             |                                   |                          | CCCP     | 144,48         | 53,99    | 138,43 | 21,85       | - 4,19   | 251,18 | 58,51   | 73,85    | 0,311        |
|                             |                                   | SDHA/b-actin (AU)        | UT       | 328,90         | 14,77    | 263,85 | 19,86       | - 19,78  | 831,23 | 234,23  | 152,73   | 0,106        |
|                             |                                   |                          | CCCP     | 158,72         | 9,02     | 204,41 | 14,98       | 28,79    | 318,22 | 44,52   | 100,49   | 0,055        |
|                             |                                   | TFAM/b-actin (AU)        | UT       | 116,13         | 1,94     | 120,46 | 0,73        | 3,73     | 240,93 | 172,55  | 107,47   | 0,647        |
|                             |                                   |                          | CCCP     | 56,12          | 10,94    | 224,77 | 6,17        | 300,52   | 141,74 | 6,76    | 152,57   | <b>0,002</b> |
|                             | ATP Levels (Total n=9)            | ATP PmolA TP/ul*mgp rot) | 0 HRS    | 0,01           | 0,01     | 0,01   | 0,00        | - 29,34  | 0,01   | 0,01    | - 21,32  | 0,052        |
|                             |                                   |                          | 4 HRS    | 0,01           | 0,01     | 0,01   | 0,00        | - 24,91  | 0,01   | 0,00    | - 28,16  | <b>0,005</b> |
|                             |                                   |                          | 16 HRS   | 0,00           | 0,00     | 0,00   | 0,00        | 66,68    | 0,01   | 0,00    | 190,40   | <b>0,001</b> |
|                             |                                   |                          | 24 HRS   | 0,00           | 0,00     | 0,00   | 0,00        | 59,50    | 0,01   | 0,01    | 253,52   | <b>0,005</b> |
|                             |                                   | TFEB/GDAPH (AU)          | UT       | 0,01           | 0,00     | 0,02   | 0,00        | 88,77    | 0,03   | -       | 135,47   | 0,084        |
|                             |                                   |                          | CCCP     | 0,01           | 0,00     | 0,01   | 0,00        | 31,73    | 0,02   | -       | 53,94    | <b>0,030</b> |
| Autophagy                   | Regulation (Total n=6)            | PGC1D/GDA PH (AU)        | UT       | 0,08           | 0,00     | 0,12   | 0,00        | 49,71    | 0,11   | -       | 40,87    | <b>0,014</b> |
|                             |                                   |                          | CCCP     | 0,57           | 0,11     | 2,76   | 0,17        | 382,94   | 0,44   | -       | - 23,21  | <b>0,015</b> |
|                             | Autophagic flux (Total n=9)       | P62/bACTIN (AU)          | UT       | 252,42         | 30,69    | 137,08 | 16,69       | - 45,69  | 193,86 | 56,29   | - 23,20  | 0,184        |
|                             |                                   |                          | BAF      | 924,84         | 555,57   | 602,24 | 149,36      | - 34,88  | 887,29 | 145,28  | - 4,06   | 0,776        |
|                             | LC3B2/bACTIN (AU)                 | UT                       | 1.499,54 | 754,45         | 559,01   | 253,21 | - 62,72     | 674,63   | 176,19 | - 55,01 | 0,316    |              |
|                             |                                   | BAF                      | 4.385,22 | 1.404,53       | 2.624,67 | 949,57 | - 40,15     | 3.193,41 | 364,23 | - 27,18 | 0,446    |              |

wt/wt: controls, wt/N370S heterozygous subjects for *GBA* mutation and N370S/N370S: homozygous patients with *GBA* mutation. DOD: days of differentiation, UT: untreated, BAF: bafilomycin.
